# Supplementary material for: Ancillary ligand enabled structural and fluorescence diversity in metal–organic frameworks: application for the ultra-sensitive detection of nitrofuran antibiotics
Source: Royal Society of Chemistry journal article supplement (doi:10.1039/d0qi01098g), 2020-12-18
Supplement: d0qi01098g1.pdf [file d0qi01098g1.pdf]

## Supporting Information

### **Ancillary ligand enabled structural and fluorescent diversity in metal-organic frameworks: application for ultra-sensitive detection of nitrofurantoin antibiotics**

Zhen Lei,<sup>‡</sup> Lei Hu,<sup>‡</sup> Zi-Hao Yu, Qiu-Yang Yao, Xi Chen, Hao Li, Rong-  
Mei Liu\*, Chuan-Ping Li, and Xian-Dong Zhu\*

*Anhui Province Key Laboratory of Functional Coordinated Complexes for Materials  
Chemistry and Application, School of Biological & Chemical Engineering, Anhui  
Polytechnic University, Wuhu 241000, P.R. China.*

\* Corresponding author. E-mail: zhuxd@ahpu.edu.cn; liurongmei@ahpu.edu.cn.

<sup>‡</sup> These authors contributed equally to this work.

**Table S1.** Crystallographic Data for **FCS-4** and **FCS-5**.

| <i>Compounds</i>                                        | <i>FCS-4</i>                                                                   | <i>FCS-5</i>                                                       |
|---------------------------------------------------------|--------------------------------------------------------------------------------|--------------------------------------------------------------------|
| <b>Empirical formula</b>                                | C <sub>44</sub> H <sub>34</sub> N <sub>2</sub> O <sub>22</sub> Zn <sub>3</sub> | C <sub>22</sub> H <sub>20</sub> NO <sub>11.5</sub> Zn <sub>2</sub> |
| <b>Formula mass</b>                                     | 1138.84                                                                        | 613.13                                                             |
| <b>Crystal system</b>                                   | monoclinic                                                                     | triclinic                                                          |
| <b>Space group</b>                                      | <i>P2<sub>1</sub>/c</i>                                                        | <i>P-1</i>                                                         |
| <b>a (Å)</b>                                            | 9.8772(8)                                                                      | 8.2490(5)                                                          |
| <b>b (Å)</b>                                            | 17.151(3)                                                                      | 11.0993(6)                                                         |
| <b>c (Å)</b>                                            | 13.5423(15)                                                                    | 13.7359(7)                                                         |
| <b>α (°)</b>                                            | 90                                                                             | 89.549(4)                                                          |
| <b>β (°)</b>                                            | 97.668(9)                                                                      | 86.324(4)                                                          |
| <b>γ (°)</b>                                            | 90                                                                             | 72.561(5)                                                          |
| <b>V (Å<sup>3</sup>)</b>                                | 2273.6(5)                                                                      | 1197.27(11)                                                        |
| <b>Z</b>                                                | 2                                                                              | 2                                                                  |
| <b>D<sub>calc</sub> (g·cm<sup>-3</sup>)</b>             | 1.663                                                                          | 1.701                                                              |
| <b>Reflections collected</b>                            | 14543                                                                          | 15781                                                              |
| <b>Data [<i>I</i>&gt;2σ(<i>I</i>)]/parameters</b>       | 5367/322                                                                       | 5717/334                                                           |
| <b>Goodness-of-fit on F<sup>2</sup></b>                 | 0.955                                                                          | 1.048                                                              |
| <b>R<sub>1</sub> indices [<i>I</i>&gt;2σ(<i>I</i>)]</b> | 0.0848                                                                         | 0.0375                                                             |
| <b>wR<sub>2</sub> indices (all data)</b>                | 0.2201                                                                         | 0.1026                                                             |
| <b>Residual electron density</b>                        | 0.755                                                                          | 0.879                                                              |

<sup>a</sup>  $R = \frac{\sum ||F_o| - |F_c||}{\sum |F_o|}$ . <sup>b</sup>  $wR(F^2) = [\sum w(F_o^2 - F_c^2)^2 / \sum w(F_o^2)^2]^{1/2}$ .

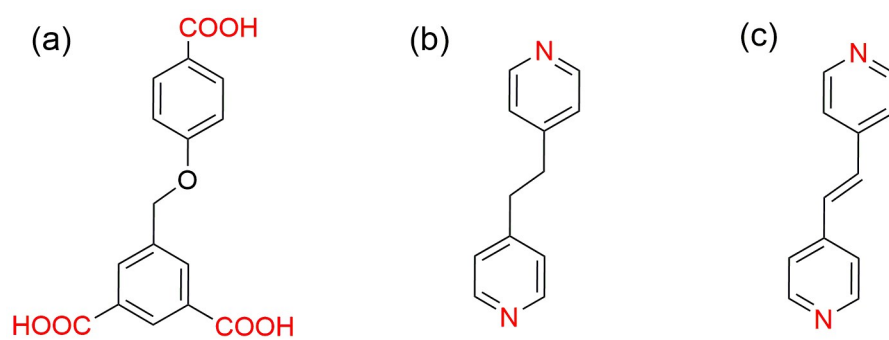

**Fig. S1** Schematic illustration of (a) H<sub>3</sub>cbbi, (b) bpe and (c) bpee ligands.

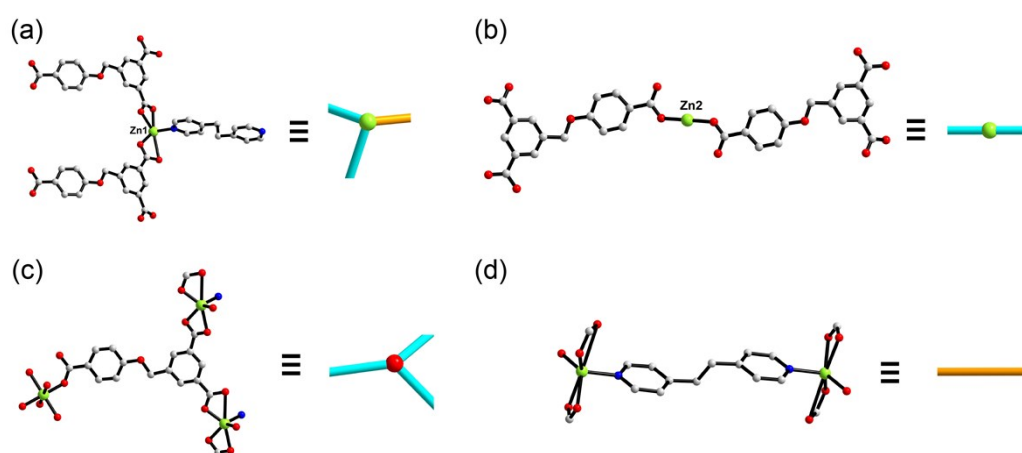

**Fig. S2** (a) Zn1 atom as a trinode; (b) Zn2 atom as a dinode; (c) cbbi<sup>3-</sup> ligand as a trinode; (d) bpe ligand as a linker.

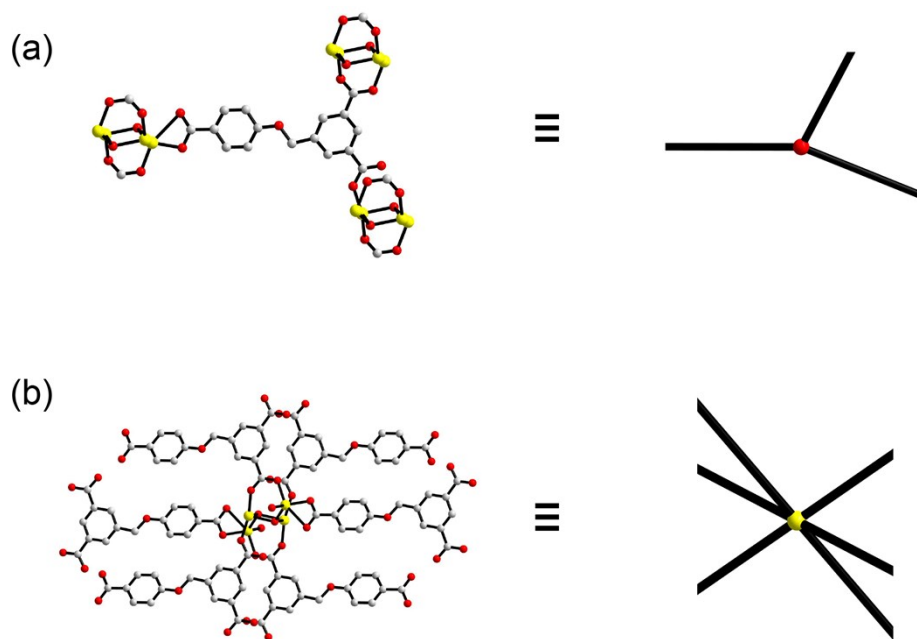

**Fig. S3** (a)  $\text{cbbi}^{3-}$  ligand as a trinode; (b) tetranuclear zinc atoms as a hexanode.

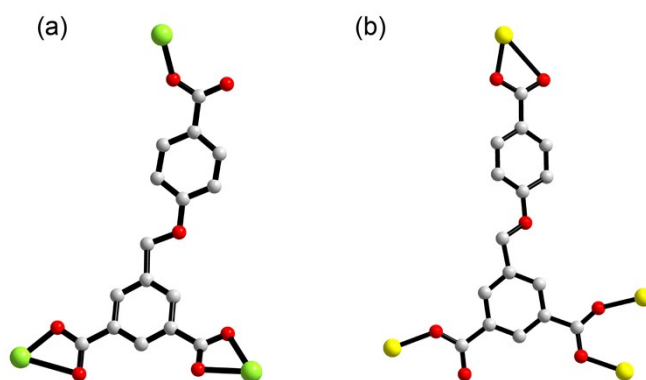

**Fig. S4** Coordination modes of  $\text{cbbi}^{3-}$  ligands in (a) FCS-4 and (b) FCS-5.

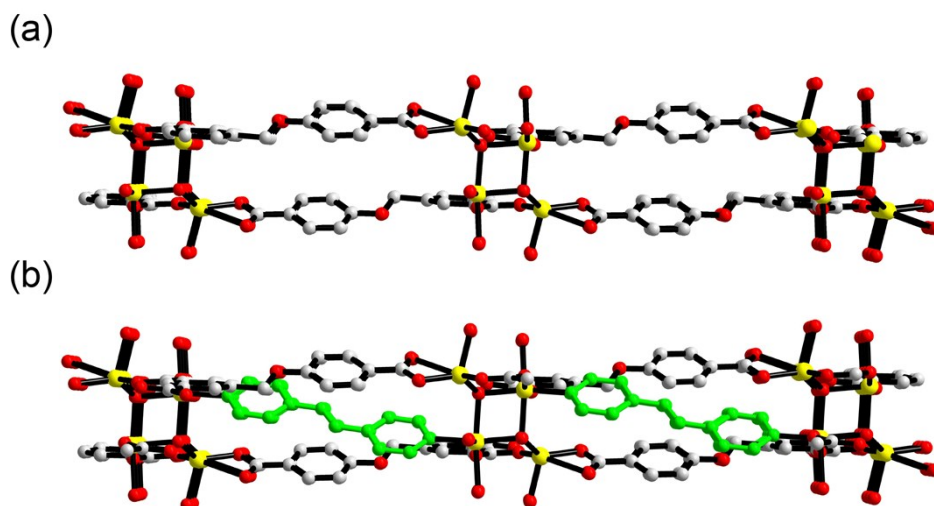

Fig. S5 Double-layer structure of FCS-5 (a) without and (b) with bpee ligand.

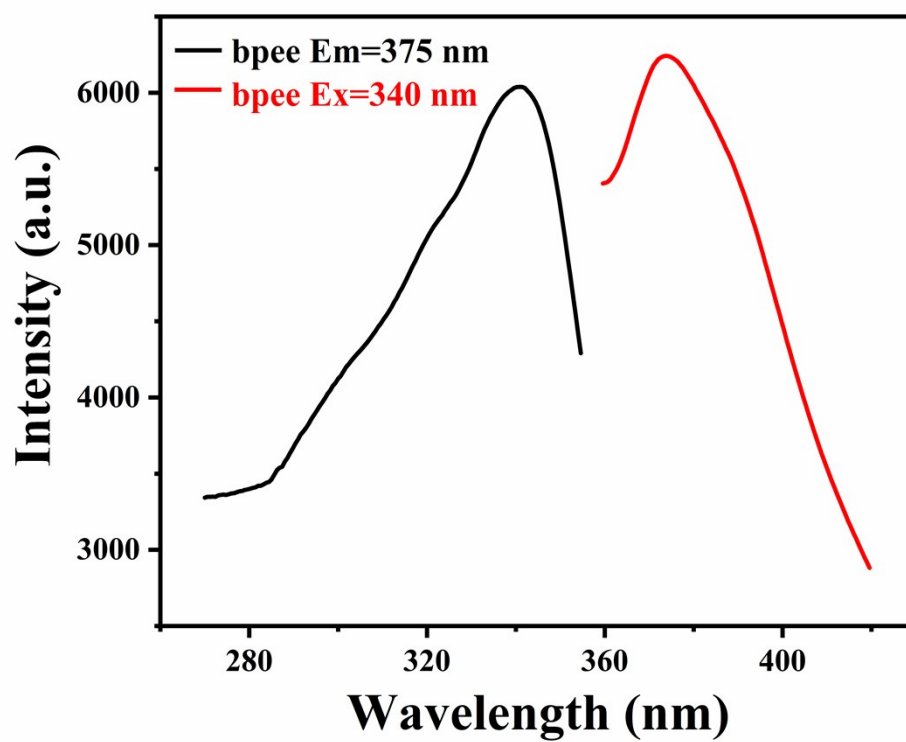

Fig. S6 The solid-state fluorescence spectrum of free ligand bpee.

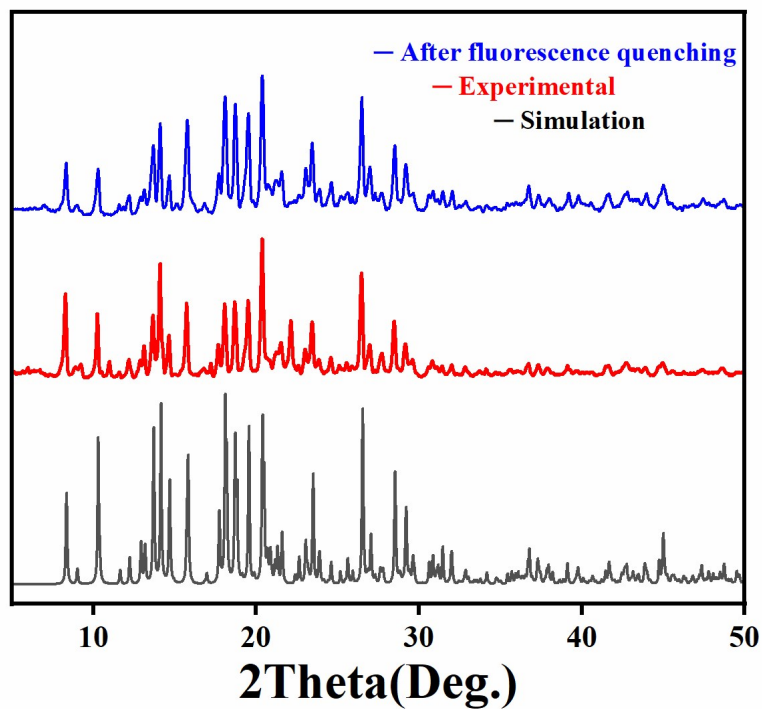

**Fig. S7** The stimulated and experimental PXR D patterns of FCS-4 before and after the fluorescence quenching experiments.

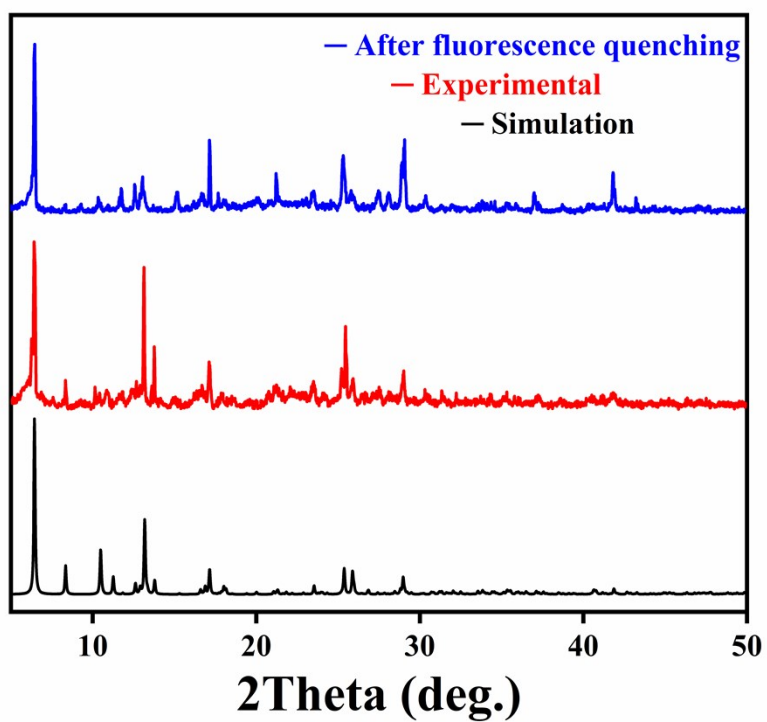

**Fig. S8** The stimulated and experimental PXR D patterns of FCS-5 before and after the fluorescence quenching experiments.

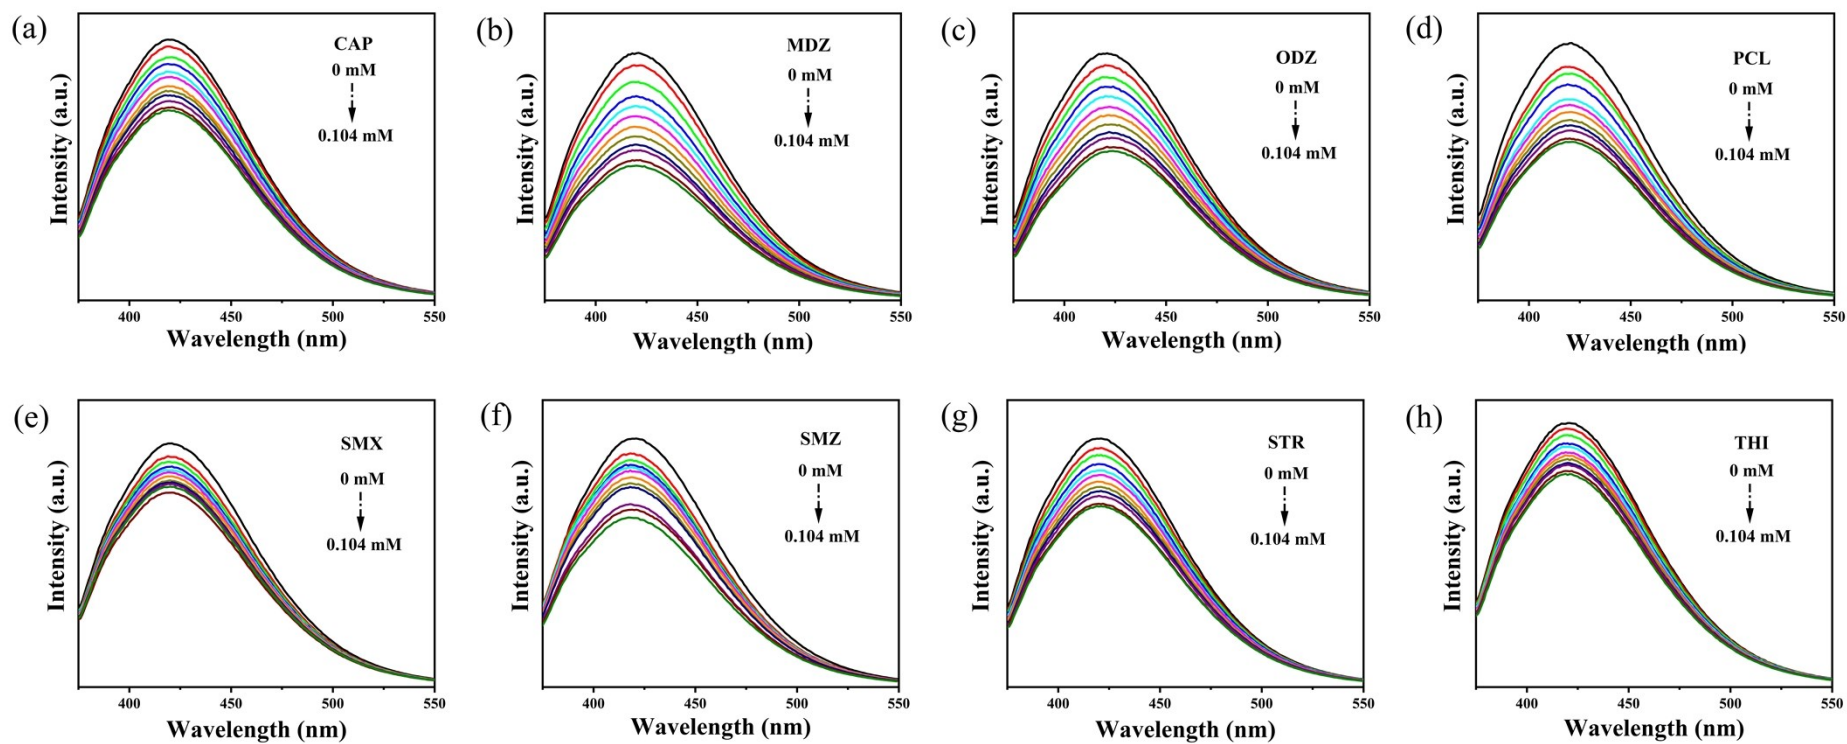

**Fig. S9** The fluorescence titration of FCS-5 with gradual addition of different antibiotics.

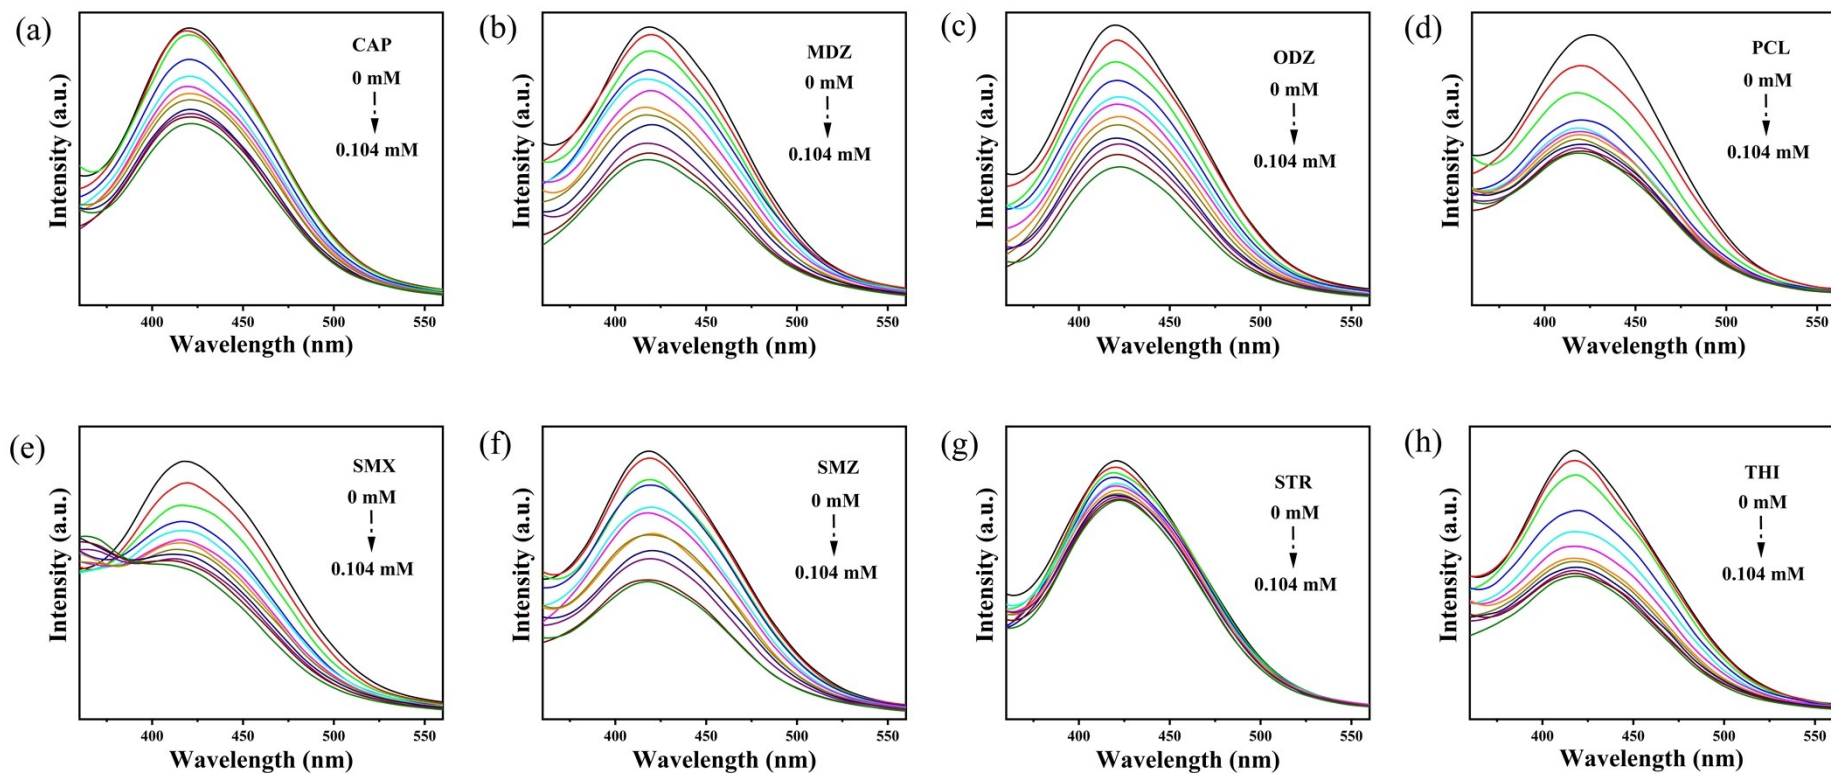

Fig. S10 The fluorescence titration of FCS-4 with gradual addition of different antibiotics.



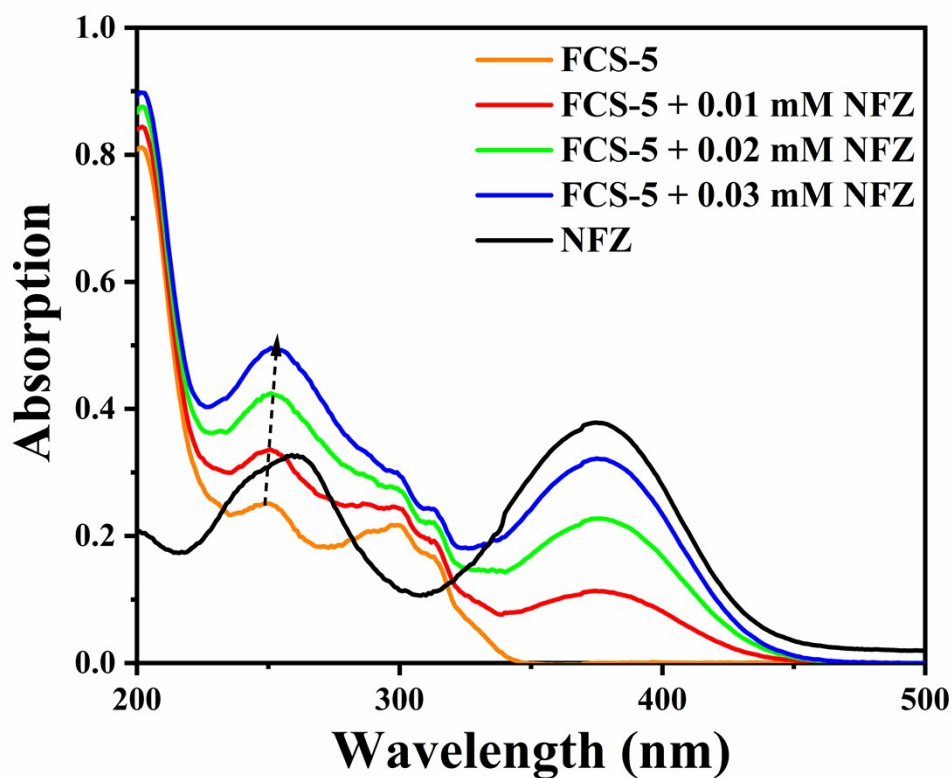

Fig. S11 UV-Vis spectra of FCS-5 before and after the addition of NFZ.

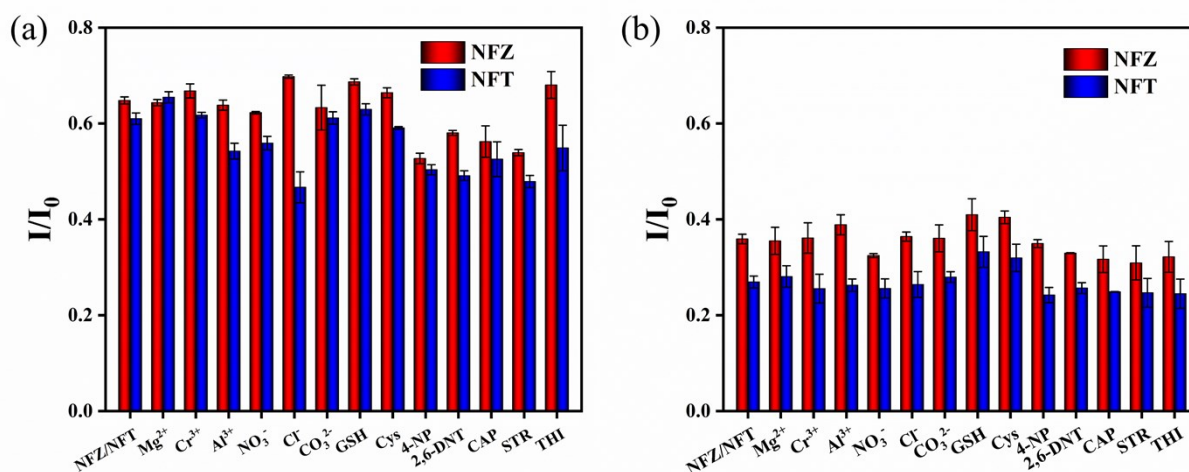

Fig. S12 Anti-interference ability of (a) FCS-4 and (b) FCS-5 toward NFZ/NFT (0.05 mM) in the presence of various kinds of interfering substances (0.25 mM).

**Equation S1:** Fitted curves of (1) **FCS-4** and (2) **FCS-5**.

(1)  $y=128.0\exp(-x/19.39)-5.14$

(2)  $y=176.6 \exp(-x/10.27)+1.64$
